# Supplementary material for: Occupational risk of SARS-CoV-2 infection: a nationwide register-based study of the Danish workforce during the COVID-19 pandemic, 2020–2021
Source: PubMed Central journal article supplement — Occup Environ Med. 2023 Feb 22;80(4):202–8. doi: 10.1136/oemed-2022-108713 (PMC10086477; doi:10.1136/oemed-2022-108713), 2023-02-22
Supplement: oemed-2022-108713supp001.pdf [file oemed-2022-108713supp001.pdf]

## ONLINE SUPPLEMENTAL MATERIAL

### Occupational risk of SARS-CoV-2 infection: a nationwide register-based study of the Danish workforce during the Covid-19 pandemic 2020-21

**Running head:** Occupational risk of SARS-CoV-2 infection

**Authors:** Jens Peter Ellekilde Bonde<sup>1,2</sup>, Luise Mølenberg Begtrup<sup>1,2</sup>, Johan Høy Jensen<sup>1</sup>, Esben Meulengracht Flachs<sup>1</sup>, Vivi Schlünssen<sup>3</sup>, Henrik Albert Kolstad<sup>4</sup>, Kristina Jakobsson<sup>5</sup>, Christel Nielsen<sup>6,7</sup>, Kerstin Nilsson<sup>6,8</sup>, Lars Rylander<sup>6</sup>, Andreas Vilhelmsson<sup>6</sup>, Kajsa Ugelvig Petersen<sup>1</sup>, Sandra Søgaaard Tøttenborg<sup>1,2</sup>

#### Abstract

**Objectives** Most earlier studies on occupational risk of Covid-19 covering the entire workforce are based on relatively rare outcomes such as hospital admission and mortality. This study examines the incidence of SARS-CoV-2 infection by occupational group based upon real-time polymerase chain reaction tests (RT-PCR).

**Methods** The cohort includes 2.4 million Danish employees, 20-69 years of age. All data were retrieved from public registries. The incidence rate ratios (IRR) of first-occurring positive RT-PCR test from week 8 of 2020 through week 50 of 2021 were computed by Poisson regression for each 4-digit DISCO-08 job code with more than 100 male and 100 female employees (n=205). Occupational groups with low risk of workplace infection according to a job exposure matrix constituted the reference group. Risk estimates were adjusted by demographic, social and health characteristics including household size, completed Covid-19 vaccination, pandemic wave and occupation-specific frequency of testing.

**Results** IRRs of SARS-CoV-2 infection were elevated in seven healthcare occupations and 42 occupations in other sectors, mainly social work activities, residential care, education, defense and security, accommodation and transportation. No IRRs were exceeding 2.0. The relative risk in healthcare, residential care and defense/security declined across pandemic waves. Decreased IRRs were observed in 12 occupations.

**Discussion** We observed a modestly increased risk of SARS-CoV-2 infection among employees in numerous occupations indicating a large potential for preventive actions. Cautious interpretation of observed risk in specific occupations is needed because of methodological issues inherent in analyses of RT-PCR test results and because of multiple statistical tests.

Journal reference main text

**Supplemental Figure S1.** Directed acyclic graph (DAG). A national follow-up study of occupational risk of SARS-CoV2 infection 2020-2021.

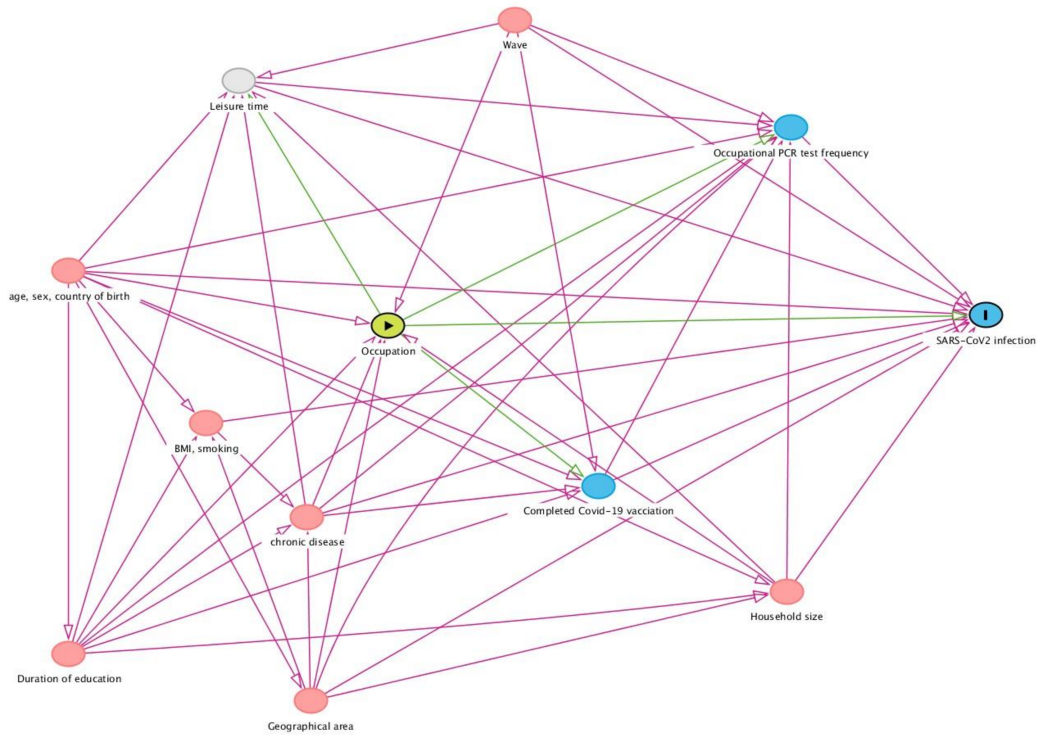

Red circles symbolize potential confounders (ancestor of both exposure *and* outcomes). Grey circle named “leisure time” symbolizes an unobserved mediating factor (on the causal path from exposure (occupation) to outcome (infection)). Blue circles “occupational PCR test Frequency” and “Completed Covid-19 vaccination” symbolize observed potential mediating factors. In order to estimate the direct effect of occupation on SARS-CoV2 infection not mediated by occupational PCR test frequency and Covid-19 vaccination, we adjust for all potential confounders and mediators except for the unobserved variable “leisure time”.

**Supplemental table S1.** Characteristics of the reference population<sup>1</sup> in a Danish follow-up study of occupational risk of SARS-CoV-2 infection.

| Occupation                                                      | DISCO-08 code | N employees | % Women | Mean PCR-tests <sup>2</sup> |
|-----------------------------------------------------------------|---------------|-------------|---------|-----------------------------|
| General Office Clerks                                           | 4110          | 96 640      | 74.8    | 12.4                        |
| Commercial Sales Representatives                                | 3322          | 33 549      | 35.5    | 12.7                        |
| Software Developers                                             | 2512          | 25 789      | 23.3    | 10.3                        |
| Accounting Associate Professionals                              | 3313          | 20 991      | 69.7    | 13.0                        |
| Stock Clerks                                                    | 4321          | 14 390      | 22.8    | 9.9                         |
| Systems Analysts                                                | 2511          | 13 923      | 21.7    | 9.6                         |
| Accountants                                                     | 2411          | 13 234      | 44.5    | 12.7                        |
| Clerical Support Workers Not Elsewhere Classified               | 4419          | 12 768      | 65.1    | 12.0                        |
| Sales and Marketing Managers                                    | 1221          | 11 240      | 23.8    | 12.8                        |
| Accounting and Bookkeeping Clerks                               | 4311          | 11 158      | 78.7    | 13.5                        |
| Advertising and Marketing Professionals                         | 2431          | 10 733      | 57.7    | 11.8                        |
| Buyers                                                          | 3323          | 10 393      | 50.3    | 13.7                        |
| Payroll Clerks                                                  | 4322          | 8677        | 31.9    | 9.5                         |
| Statistical, Finance and Insurance Clerks                       | 4312          | 8660        | 67.4    | 11.8                        |
| Management and Organization Analysts                            | 2421          | 8561        | 45.5    | 11.6                        |
| Information and Communications Technology User Support          | 3512          | 8048        | 22.8    | 10.7                        |
| Credit and Loans Officers                                       | 3312          | 7564        | 55.9    | 12.4                        |
| Financial Analysts                                              | 2413          | 7196        | 38.7    | 10.8                        |
| Contact Centre Salespersons                                     | 5244          | 6297        | 49.3    | 11.6                        |
| Draughtspersons                                                 | 3118          | 6231        | 50.8    | 11.8                        |
| Finance Managers                                                | 1211          | 5940        | 35.8    | 13.3                        |
| Policy and Planning Managers                                    | 1213          | 5482        | 46.4    | 11.5                        |
| Personnel and Careers Professionals                             | 2423          | 5448        | 64.3    | 12.2                        |
| Contact Centre Information Clerks                               | 4222          | 5045        | 50.5    | 9.8                         |
| Building Architects                                             | 2161          | 4992        | 44.6    | 10.8                        |
| Technical and Medical Sales Professionals (excluding ICT)       | 2433          | 4932        | 33.2    | 12.1                        |
| Economists                                                      | 2631          | 4855        | 48.9    | 11.6                        |
| Policy Administration Professionals                             | 2422          | 4574        | 48.1    | 11.2                        |
| Software and Applications Developers and Analysts Not Elsewhere | 2519          | 4398        | 27.9    | 10.6                        |
| Education Methods specialists                                   | 2351          | 4243        | 70.8    | 13.4                        |
| Employment Agents and Contractors                               | 3333          | 4193        | 66.7    | 10.7                        |
| Systems Administrators                                          | 2522          | 4084        | 17.2    | 10.9                        |
| Transport Clerks                                                | 4323          | 3796        | 34.3    | 12.8                        |
| Government Tax and Excise Officials                             | 3352          | 3602        | 66.8    | 8.3                         |
| Information and Communications Technology Sales Professionals   | 2434          | 3460        | 30.3    | 10.8                        |
| Web and Multimedia Developers                                   | 2513          | 3270        | 30.6    | 10.0                        |
| Information Technology Services Managers                        | 1330          | 3094        | 15.4    | 12.1                        |
| Public Relations Professionals                                  | 2432          | 3040        | 60.3    | 11.7                        |
| Insurance Representatives                                       | 3321          | 3031        | 33.8    | 11.5                        |
| Database and Network Professionals Not Elsewhere Classified     | 2529          | 2870        | 21.6    | 10.6                        |
| Personnel Clerks                                                | 4416          | 2696        | 79.9    | 13.0                        |
| Applications Programmers                                        | 2514          | 2452        | 20.4    | 9.5                         |
| Research and Development Managers                               | 1223          | 2291        | 24.9    | 12.2                        |
| Securities and Finance Dealers and Brokers                      | 3311          | 2238        | 36.7    | 11.1                        |
| Product and Garment Designers                                   | 2163          | 2215        | 73.5    | 13.1                        |
| Computer Network and Systems Technicians                        | 3513          | 2044        | 11.0    | 11.2                        |
| Graphic and Multimedia Designers                                | 2166          | 2039        | 52.0    | 11.1                        |
| Data Entry Clerks                                               | 4132          | 1930        | 56.5    | 12.1                        |
| Training and Staff Development Professionals                    | 2424          | 1862        | 70.8    | 12.6                        |
| Payroll Clerks                                                  | 4313          | 1688        | 87.8    | 13.8                        |

|                                                               |      |      |      |      |
|---------------------------------------------------------------|------|------|------|------|
| Legal and Related Associate Professionals                     | 3411 | 1605 | 78.2 | 12.8 |
| Information and Communications Technology Operations          | 3511 | 1511 | 15.0 | 11.0 |
| Client Information Workers Not Elsewhere Classified           | 4229 | 1424 | 59.8 | 12.5 |
| Telephone Switchboard Operators                               | 4223 | 1349 | 83.7 | 13.7 |
| Valuers and Loss Assessors                                    | 3315 | 1188 | 17.3 | 11.4 |
| Translators, Interpreters and Other Linguists                 | 2643 | 1184 | 69.5 | 11.8 |
| Database Designers and Administrators                         | 2521 | 994  | 23.0 | 9.6  |
| Landscape Architects                                          | 2162 | 972  | 58.3 | 10.5 |
| Government Social Benefits Officials                          | 3353 | 968  | 88.0 | 11.8 |
| Cartographers and Surveyors                                   | 2165 | 962  | 25.7 | 13.3 |
| Computer Network Professionals                                | 2523 | 958  | 14.4 | 11.9 |
| Advertising and Public Relations Managers                     | 1222 | 818  | 45.4 | 11.0 |
| Conference and Event Planners                                 | 3332 | 764  | 71.6 | 12.8 |
| Survey and Market Research Interviewers                       | 4227 | 740  | 51.8 | 10.0 |
| Statistical, Mathematical and Related Associate Professionals | 3314 | 668  | 39.1 | 10.7 |
| Debt Collectors and Related Workers                           | 4214 | 663  | 68.9 | 13.0 |
| Trade Brokers                                                 | 3324 | 536  | 37.9 | 11.9 |
| Inquiry Clerks                                                | 4225 | 465  | 57.0 | 11.6 |
| Town and Traffic Planners                                     | 2164 | 369  | 38.5 | 11.8 |
| Authors and Related Writers                                   | 2641 | 312  | 55.4 | 10.2 |
| Web Technicians                                               | 3514 | 295  | 35.9 | 11.0 |
| Typists and Word Processing Operators                         | 4131 | 257  | 48.6 | 12.6 |
| Library Clerks                                                | 4411 | 241  | 62.2 | 11.9 |
| Coding, Proofreading and Related Clerks                       | 4413 | 202  | 75.7 | 9.5  |
| Medical Records and Health Information Technicians            | 3252 | 166  | 65.1 | 14.2 |
| Meteorologists                                                | 2112 | 153  | 32.7 | 11.9 |
| Visual Artists                                                | 2651 | 152  | 48.7 | 8.8  |

<sup>1</sup> The reference group comprised occupations defined at the 4-digit DISCO-08 level that according to the job exposure matrix<sup>1</sup> are not expected to be associated with exposure to SARS-CoV-2 (sumscore of 4 dimensions on virus transmission = 0).

<sup>2</sup> The average number of PCR tests per employee and occupation during the follow-up period.

**Supplemental table S2.** Occupations with increased risk of SARS-CoV2 infection (incidence rate ratio IRR with 99% CI) relative to occupations with low likelihood of exposure according to a Covid-19 job exposure matrix. Upper panel: 49 occupations with fully adjusted elevated IRR ; lower panel: 15 occupations where adjustment for occupational test frequency attenuated risk to a non-significant level.

| MAIN ECONOMIC SECTOR (DB07 2- digit codes)                       |      |        |         |                    |                  |                  |        |                  |        |     |     |  |
|------------------------------------------------------------------|------|--------|---------|--------------------|------------------|------------------|--------|------------------|--------|-----|-----|--|
| Occupation. 4-digit DISCO-08 codes (descending number employees) | Code | N      | % women | Tests <sup>0</sup> | IRR <sup>1</sup> | IRR <sup>2</sup> | 99% CI | IRR <sup>3</sup> | 99% CI |     |     |  |
| <b>SOCIAL WORK ACTIVITIES, n = 138 888</b>                       |      |        |         |                    |                  |                  |        |                  |        |     |     |  |
| Early childhood educators                                        | 2343 | 70 233 | 80.1    | 14.4               | 1.41             | 1.46             | 1.4    | 1.5              | 1.34   | 1.3 | 1.4 |  |
| Childcare workers                                                | 5311 | 48 101 | 80.7    | 12.6               | 1.43             | 1.34             | 1.3    | 1.4              | 1.26   | 1.2 | 1.3 |  |
| Social Work and Counselling Professionals                        | 2635 | 15 861 | 88.2    | 12.1               | 1.03             | 1.12             | 1.0    | 1.2              | 1.15   | 1.1 | 1.2 |  |
| Child Care Services Managers                                     | 1341 | 4693   | 76.5    | 14.4               | 1.50             | 1.59             | 1.4    | 1.8              | 1.45   | 1.3 | 1.6 |  |
| <b>RESIDENTIAL CARE ACTIVITIES, n=138 118</b>                    |      |        |         |                    |                  |                  |        |                  |        |     |     |  |
| Home-based Personal Care Workers                                 | 5322 | 86 458 | 90.4    | 21.5               | 1.46             | 1.30             | 1.3    | 1.3              | 1.14   | 1.1 | 1.2 |  |
| Health Care Assistants                                           | 5321 | 44 641 | 78.9    | 18.1               | 1.37             | 1.34             | 1.3    | 1.4              | 1.17   | 1.1 | 1.3 |  |
| Social Work Associate Professionals                              | 3412 | 7019   | 73.4    | 10.7               | 1.22             | 1.15             | 1.0    | 1.3              | 1.14   | 1.0 | 1.3 |  |
| <b>EDUCATION, n = 112 564</b>                                    |      |        |         |                    |                  |                  |        |                  |        |     |     |  |
| Primary school teachers                                          | 2341 | 76 740 | 66.8    | 13.0               | 1.42             | 1.56             | 1.5    | 1.6              | 1.48   | 1.4 | 1.5 |  |
| Secondary Education Teachers                                     | 2330 | 15 128 | 55.3    | 10.9               | 1.05             | 1.18             | 1.1    | 1.3              | 1.22   | 1.1 | 1.3 |  |
| Vocational Education Teachers                                    | 2320 | 10 245 | 44.4    | 11.4               | 1.06             | 1.21             | 1.1    | 1.3              | 1.25   | 1.1 | 1.4 |  |
| Education Managers                                               | 1345 | 4772   | 45.2    | 11.9               | 1.28             | 1.43             | 1.3    | 1.6              | 1.47   | 1.3 | 1.6 |  |
| Special Needs Teachers                                           | 2352 | 3895   | 63.3    | 14.5               | 1.34             | 1.61             | 1.4    | 1.8              | 1.45   | 1.3 | 1.7 |  |
| Other Music Teachers                                             | 2354 | 1784   | 46.7    | 11.2               | 1.32             | 1.39             | 1.2    | 1.7              | 1.43   | 1.2 | 1.7 |  |
| <b>HEALTH CARE, n = 110 663</b>                                  |      |        |         |                    |                  |                  |        |                  |        |     |     |  |
| Nursing Professionals                                            | 2221 | 63 600 | 96.0    | 21.3               | 1.39             | 1.58             | 1.5    | 1.6              | 1.45   | 1.4 | 1.5 |  |
| Generalist Medical Practitioners                                 | 2211 | 19 826 | 57.5    | 15.9               | 1.28             | 1.47             | 1.4    | 1.6              | 1.33   | 1.2 | 1.5 |  |
| Physiotherapists                                                 | 2264 | 9615   | 77.2    | 25.5               | 1.18             | 1.39             | 1.3    | 1.5              | 1.27   | 1.1 | 1.4 |  |
| Health Professionals Not Elsewhere Classified                    | 2269 | 8856   | 89.8    | 22.8               | 1.09             | 1.31             | 1.2    | 1.4              | 1.20   | 1.1 | 1.3 |  |
| Medical and Pathology Laboratory Technicians                     | 3212 | 6785   | 89.3    | 19.5               | 1.28             | 1.30             | 1.2    | 1.4              | 1.19   | 1.1 | 1.3 |  |
| Specialist Medical Practitioners                                 | 2212 | 1222   | 39.9    | 12.3               | 1.41             | 1.37             | 1.1    | 1.7              | 1.40   | 1.1 | 1.8 |  |
| Nursing Associates Professionals                                 | 3221 | 759    | 62.1    | 17.2               | 1.80             | 1.40             | 1.1    | 1.7              | 1.26   | 1.0 | 1.6 |  |
| <b>DEFENSE AND SECURITY, n=34 404</b>                            |      |        |         |                    |                  |                  |        |                  |        |     |     |  |
| Police Officers                                                  | 5412 | 9913   | 17.8    | 14.5               | 1.43             | 1.47             | 1.4    | 1.6              | 1.34   | 1.2 | 1.5 |  |
| Armed Forces Occupations. Other Ranks                            | 0310 | 9046   | 12.3    | 13.2               | 0.90             | 1.24             | 1.1    | 1.4              | 1.18   | 1.1 | 1.3 |  |
| Science and Engineering Professionals                            | 0210 | 4398   | 6.8     | 14.2               | 0.93             | 1.31             | 1.1    | 1.5              | 1.18   | 1.0 | 1.4 |  |
| Commissioned Armed Forces Officers                               | 0110 | 4004   | 8.6     | 13.4               | 1.05             | 1.34             | 1.2    | 1.5              | 1.26   | 1.1 | 1.4 |  |
| Protective Services Workers Not Elsewhere Classified             | 5419 | 3745   | 22.1    | 9.5                | 1.38             | 1.30             | 1.2    | 1.5              | 1.47   | 1.3 | 1.7 |  |
| Ambulance Workers                                                | 3258 | 1771   | 10.6    | 10.2               | 1.31             | 1.75             | 1.5    | 2.1              | 1.80   | 1.5 | 2.1 |  |
| Legislators                                                      | 1111 | 1527   | 38.2    | 11.1               | 1.41             | 1.47             | 1.2    | 1.8              | 1.52   | 1.2 | 1.8 |  |
| <b>ACCOMODATION AND FOOD, n = 15 366</b>                         |      |        |         |                    |                  |                  |        |                  |        |     |     |  |
| Waiters                                                          | 5131 | 10 921 | 59.0    | 9.9                | 1.43             | 1.29             | 1.2    | 1.4              | 1.45   | 1.3 | 1.6 |  |
| Food Service Counter Attendants                                  | 5246 | 2293   | 58.5    | 9.5                | 1.21             | 1.17             | 1.0    | 1.3              | 1.31   | 1.1 | 1.5 |  |
| Bartenders                                                       | 5132 | 1094   | 44.3    | 9.3                | 1.60             | 1.38             | 1.1    | 1.7              | 1.55   | 1.3 | 1.9 |  |
| Restaurant Managers                                              | 1412 | 701    | 37.2    | 10.2               | 1.56             | 1.34             | 1.1    | 1.7              | 1.32   | 1.0 | 1.7 |  |
| Hotel Managers                                                   | 1411 | 357    | 51.5    | 11.9               | 1.50             | 1.46             | 1.0    | 2.1              | 1.51   | 1.0 | 2.2 |  |
| <b>TRANSPORTATION, n = 11 688</b>                                |      |        |         |                    |                  |                  |        |                  |        |     |     |  |
| Bus and Tram Drivers                                             | 8331 | 10 879 | 15.3    | 7.9                | 1.47             | 1.16             | 1.1    | 1.3              | 1.46   | 1.3 | 1.6 |  |
| Transport Conductors                                             | 5112 | 809    | 37.9    | 12.3               | 1.82             | 1.52             | 1.2    | 1.9              | 1.49   | 1.2 | 1.9 |  |
| <b>OTHER ACTIVITIES, n = 88 251</b>                              |      |        |         |                    |                  |                  |        |                  |        |     |     |  |
| Managing Directors and Chief Executives                          | 1120 | 21 681 | 14.9    | 11.5               | 1.21             | 1.21             | 1.1    | 1.3              | 1.25   | 1.2 | 1.3 |  |
| Food and Related Products Machine Operators                      | 8160 | 17 038 | 28.5    | 7.9                | 1.52             | 1.59             | 1.5    | 1.7              | 2.00   | 1.8 | 2.2 |  |
| Civil Engineering Technicians                                    | 3112 | 11 501 | 15.0    | 12.1               | 1.01             | 1.11             | 1.0    | 1.2              | 1.13   | 1.0 | 1.2 |  |
| Journalists                                                      | 2642 | 9748   | 49.5    | 11.4               | 1.19             | 1.15             | 1.1    | 1.2              | 1.18   | 1.1 | 1.3 |  |
| Lawyers                                                          | 2611 | 5640   | 48.7    | 11.0               | 1.15             | 1.14             | 1.0    | 1.3              | 1.17   | 1.1 | 1.3 |  |
| Hairdressers                                                     | 5141 | 5466   | 88.9    | 10.3               | 1.24             | 1.20             | 1.1    | 1.3              | 1.22   | 1.1 | 1.3 |  |
| Personal Services Workers Not Elsewhere Classified               | 5169 | 4408   | 39.7    | 10.1               | 1.43             | 1.23             | 1.1    | 1.4              | 1.22   | 1.1 | 1.4 |  |
| Musicians. Singers and Composers                                 | 2652 | 2818   | 57.7    | 12.9               | 1.43             | 1.47             | 1.3    | 1.7              | 1.37   | 1.2 | 1.6 |  |
| Business Services Agents                                         | 3339 | 2623   | 55.6    | 12.1               | 1.27             | 1.22             | 1.1    | 1.4              | 1.26   | 1.1 | 1.5 |  |

|                                                                                                           |      |         |      |      |      |      |     |     |      |     |     |
|-----------------------------------------------------------------------------------------------------------|------|---------|------|------|------|------|-----|-----|------|-----|-----|
| Religious Professionals                                                                                   | 2636 | 2591    | 55.3 | 11.7 | 1.19 | 1.36 | 1.2 | 1.6 | 1.40 | 1.2 | 1.6 |
| Bank Tellers and Related Clerks                                                                           | 4211 | 2122    | 68.0 | 12.2 | 1.30 | 1.26 | 1.1 | 1.5 | 1.29 | 1.1 | 1.5 |
| Athletes and Sports Players                                                                               | 3421 | 1129    | 15.5 | 19.8 | 1.52 | 1.81 | 1.5 | 2.2 | 1.65 | 1.4 | 2.0 |
| Senior Officials of Special Interest Organisations                                                        | 1114 | 878     | 40.9 | 13.0 | 1.48 | 1.40 | 1.1 | 1.8 | 1.30 | 1.0 | 1.7 |
| Filing and Copying Clerks                                                                                 | 4415 | 608     | 62.0 | 12.0 | 1.36 | 1.36 | 1.0 | 1.8 | 1.41 | 1.1 | 1.8 |
| MISSING 4-DIGIT DISCO-08 CODE                                                                             | -    | 337 353 | 40.0 | 9.2  | 1.07 | 1.12 | 1.1 | 1.2 | 1.30 | 1.2 | 1.4 |
|                                                                                                           |      |         |      |      |      |      |     |     |      |     |     |
|                                                                                                           |      |         |      |      |      |      |     |     |      |     |     |
| Table S2 continued                                                                                        |      |         |      |      |      |      |     |     |      |     |     |
| <b>ADJUSTMENT BY OCCUPATIONAL PCR TEST FREQUENCY ATTENUATES IRR TO NON-SIGNIFICANT LEVELS, n = 97 700</b> |      |         |      |      |      |      |     |     |      |     |     |
| Special Teaching Professionals                                                                            | 2357 | 33 881  | 72.4 | 14.5 | 1.10 | 1.19 | 1.1 | 1.3 | 1.04 | 1.0 | 1.1 |
| Financial and Investment Advisers                                                                         | 2412 | 18 636  | 47.7 | 12.7 | 1.07 | 1.11 | 1.0 | 1.2 | 1.06 | 1.0 | 1.1 |
| Dental assistants and therapists                                                                          | 3251 | 8253    | 98.7 | 14.3 | 1.26 | 1.14 | 1.0 | 1.2 | 1.03 | 0.9 | 1.1 |
| Psychological Therapists                                                                                  | 2634 | 8072    | 78.1 | 15.1 | 0.97 | 1.13 | 1.0 | 1.2 | 1.03 | 0.9 | 1.1 |
| Clearing and Forwarding Agents                                                                            | 3331 | 7257    | 37.7 | 14.3 | 1.07 | 1.20 | 1.1 | 1.3 | 1.06 | 1.0 | 1.2 |
| Travel Attendants and Travel Stuarts                                                                      | 5111 | 3811    | 62.5 | 13.1 | 1.50 | 1.19 | 1.1 | 1.3 | 1.09 | 1.0 | 1.2 |
| Receptionists (general)                                                                                   | 4226 | 3620    | 87.5 | 13.1 | 1.31 | 1.20 | 1.1 | 1.4 | 1.11 | 1.0 | 1.3 |
| Real Estate Agents and Property Managers                                                                  | 3334 | 3134    | 52.4 | 13.8 | 1.20 | 1.19 | 1.0 | 1.4 | 1.09 | 0.9 | 1.3 |
| Prison Guards                                                                                             | 5413 | 2742    | 35.2 | 13.6 | 1.27 | 1.32 | 1.1 | 1.5 | 1.16 | 1.0 | 1.3 |
| Personal Care Workers in Health Services                                                                  | 5329 | 2654    | 77.9 | 15.8 | 1.34 | 1.19 | 1.0 | 1.4 | 1.04 | 0.9 | 1.2 |
| Medical Imaging and Equipment Operators                                                                   | 3211 | 2646    | 71.1 | 20.0 | 1.14 | 1.23 | 1.1 | 1.4 | 1.12 | 1.0 | 1.3 |
| Financial and Insurance Services Branch Managers                                                          | 1346 | 1332    | 25.6 | 14.0 | 1.21 | 1.33 | 1.1 | 1.7 | 1.20 | 1.0 | 1.5 |
| Film, Stage and Related Directors and Producers                                                           | 2654 | 1315    | 48.6 | 13.9 | 1.43 | 1.30 | 1.1 | 1.6 | 1.14 | 0.9 | 1.4 |
| Actors                                                                                                    | 2655 | 347     | 49.0 | 17.7 | 1.81 | 1.55 | 1.1 | 2.1 | 1.36 | 1.0 | 1.9 |

<sup>0</sup> Average number of PCR tests per employees and occupation from start of follow-up.

<sup>1</sup> Adjusted for sex and age (10 year groups).

<sup>2</sup> In addition to sex and age, adjusted for duration of education at baseline (5 groups), number of hospital admissions for one or more of 11 chronic diseases in the 10 years preceding start of the pandemic (3 groups), country of birth (4 groups), geographical region (5 groups), number of household members (4 groups), probability of tobacco smoking (3 groups), bodymass index (2 groups), completed Covid-19 vaccination (time varying variable, yes/no) and pandemic wave (4 groups).

<sup>3</sup> In addition to the above fully adjusted risk estimates, adjusted for the occupation-specific average number of PCR-tests during follow-up (up to and including last week before censoring) per employee (quintiles).

**Supplemental table S3.** Occupations with reduced risk of SARS-CoV2 infection ordered by descending size.

| FULLY ADJUSTED IRR WITH p-value < 0.01, N = 121 785                                               |      |        |         |                    |                  |                  |        |     |                  |        |     |  |
|---------------------------------------------------------------------------------------------------|------|--------|---------|--------------------|------------------|------------------|--------|-----|------------------|--------|-----|--|
| Occupation. 4-digit DISCO-08 codes (descending number employees)                                  | Code | N      | % Women | Tests <sup>0</sup> | IRR <sup>1</sup> | IRR <sup>2</sup> | 99% CI |     | IRR <sup>3</sup> | 99% CI |     |  |
| Civil Engineering Labourers                                                                       | 9312 | 24 198 | 11.2    | 7.5                | 0.65             | 0.69             | 0.6    | 0.7 | 0.87             | 0.8    | 1.0 |  |
| Building and Related Electricians                                                                 | 7411 | 23 498 | 1.5     | 10.4               | 0.87             | 0.91             | 0.9    | 1.0 | 0.90             | 0.8    | 1.0 |  |
| Heavy Truck and Lorry Drivers                                                                     | 8332 | 23 114 | 1.6     | 6.0                | 0.59             | 0.66             | 0.6    | 0.7 | 0.83             | 0.8    | 0.9 |  |
| Engineering Professionals Not Elsewhere Classified                                                | 2149 | 10 145 | 27.4    | 12.2               | 0.80             | 0.88             | 0.8    | 1.0 | 0.91             | 0.8    | 1.0 |  |
| Chemical and Physical Science Technicians                                                         | 3111 | 9663   | 73.9    | 14.3               | 0.93             | 0.85             | 0.8    | 0.9 | 0.78             | 0.7    | 0.9 |  |
| Industrial and Production Engineers                                                               | 2141 | 8130   | 16.9    | 12.4               | 0.72             | 0.82             | 0.7    | 0.9 | 0.85             | 0.8    | 0.9 |  |
| Mechanical Engineers                                                                              | 2144 | 5817   | 9.5     | 12.4               | 0.79             | 0.85             | 0.8    | 1.0 | 0.81             | 0.7    | 0.9 |  |
| Gardeners Horticultural and Nursery Growers                                                       | 6113 | 5180   | 28.4    | 8.0                | 0.64             | 0.66             | 0.6    | 0.8 | 0.84             | 0.7    | 1.0 |  |
| Electronics Engineering Technicians                                                               | 3114 | 4745   | 8.8     | 12.0               | 0.80             | 0.83             | 0.7    | 1.0 | 0.86             | 0.7    | 1.0 |  |
| Electrical and Electronic Equipment Assemblers                                                    | 8212 | 4086   | 52.3    | 11.5               | 0.86             | 0.86             | 0.7    | 1.0 | 0.85             | 0.7    | 1.0 |  |
| Mathematicians, Actuaries, and Statisticians                                                      | 2120 | 2028   | 37.1    | 10.5               | 0.90             | 0.78             | 0.6    | 0.9 | 0.80             | 0.7    | 1.0 |  |
| Sociologists, Anthropologists and Related Professionals                                           | 2632 | 1181   | 63.8    | 11.1               | 0.72             | 0.73             | 0.6    | 1.0 | 0.75             | 0.6    | 1.0 |  |
| ADJUSTMENT WITH OCCUPATIONAL TEST FREQUENCY ATTENUATES IRR TO NON-SIGNIFICANT LEVELS. N = 213 846 |      |        |         |                    |                  |                  |        |     |                  |        |     |  |
| Carpenters and Joiners                                                                            | 7115 | 29 978 | 1.2     | 7.4                | 0.80             | 0.87             | 0.8    | 0.9 | 1.13             | 1.0    | 1.2 |  |
| University and Higher Education Teachers                                                          | 2310 | 29 501 | 47.8    | 9.8                | 0.81             | 0.82             | 0.8    | 0.9 | 0.96             | 0.9    | 1.0 |  |
| Motor Vehicle Mechanics and Repairers                                                             | 7231 | 18 033 | 1.6     | 8.9                | 0.76             | 0.80             | 0.7    | 0.9 | 1.01             | 0.9    | 1.1 |  |
| Cooks                                                                                             | 5120 | 13 072 | 36.6    | 8.5                | 1.00             | 0.88             | 0.8    | 0.9 | 1.11             | 1.0    | 1.2 |  |
| Plumbers and Pipe Fitters                                                                         | 7126 | 12 712 | 1.0     | 8.2                | 0.92             | 0.90             | 0.8    | 1.0 | 1.13             | 1.0    | 1.2 |  |
| Metal Working Machine Tool Setters and Operators                                                  | 7223 | 12 200 | 7.6     | 9.1                | 0.72             | 0.83             | 0.8    | 0.9 | 1.04             | 0.9    | 1.2 |  |
| Blacksmiths, Hammersmiths and Forging Press Workers                                               | 7221 | 11 270 | 2.5     | 8.9                | 0.71             | 0.85             | 0.8    | 0.9 | 1.07             | 1.0    | 1.2 |  |
| Building Construction Labourers                                                                   | 9313 | 11 123 | 2.2     | 6.7                | 0.80             | 0.77             | 0.7    | 0.8 | 0.97             | 0.9    | 1.1 |  |
| Manufacturing Labourers Not Elsewhere Classified                                                  | 9329 | 10 663 | 25.6    | 8.0                | 0.79             | 0.83             | 0.8    | 0.9 | 1.04             | 0.9    | 1.2 |  |
| Painters and Related Workers                                                                      | 7131 | 9332   | 31.9    | 7.3                | 0.82             | 0.78             | 0.7    | 0.9 | 0.99             | 0.9    | 1.1 |  |
| Assemblers Not Elsewhere Classified                                                               | 8219 | 7062   | 26.4    | 9.5                | 0.74             | 0.87             | 0.8    | 1.0 | 0.98             | 0.9    | 1.1 |  |
| Stationary Plant and Machine Operators Not Elsewhere Classified                                   | 8189 | 6962   | 15.9    | 8.9                | 0.82             | 0.87             | 0.8    | 1.0 | 1.10             | 1.0    | 1.3 |  |
| Metal Processing Plant Operators                                                                  | 8121 | 5859   | 19.0    | 7.2                | 0.64             | 0.74             | 0.6    | 0.9 | 0.93             | 0.8    | 1.1 |  |
| Toolmakers and Related Workers                                                                    | 7222 | 4465   | 2.8     | 9.1                | 0.64             | 0.76             | 0.7    | 0.9 | 0.96             | 0.8    | 1.1 |  |
| Chemical Products Plant and Machine Operators                                                     | 8131 | 4368   | 26.2    | 9.4                | 1.01             | 0.85             | 0.7    | 1.0 | 0.96             | 0.8    | 1.1 |  |
| Occupations with <100 male and <100 female employees                                              | 9998 | 4140   | 37.9    | 10.4               | 0.85             | 0.90             | 0.9    | 0.9 | 1.00             | 1.0    | 1.1 |  |
| Wood Processing Plant Operators                                                                   | 8172 | 3853   | 18.3    | 7.0                | 0.61             | 0.76             | 0.6    | 0.9 | 0.96             | 0.8    | 1.2 |  |
| Service Station Attendants                                                                        | 5245 | 3798   | 54.6    | 9.2                | 0.92             | 0.83             | 0.7    | 0.9 | 0.94             | 0.8    | 1.1 |  |
| Butchers, Fishmongers and Related Food Preparers                                                  | 7511 | 3688   | 35.5    | 7.9                | 0.77             | 0.82             | 0.7    | 1.0 | 1.03             | 0.9    | 1.2 |  |
| Bakers, Pastry-cooks and Confectionery Makers                                                     | 7512 | 3403   | 35.0    | 8.1                | 0.72             | 0.74             | 0.6    | 0.9 | 0.93             | 0.8    | 1.1 |  |
| Packing, Bottling and Labelling Machine Operators                                                 | 8183 | 2166   | 47.8    | 8.8                | 0.84             | 0.81             | 0.7    | 1.0 | 1.04             | 0.8    | 1.3 |  |
| Livestock and Dairy Producers                                                                     | 6121 | 1662   | 22.7    | 4.7                | 0.48             | 0.66             | 0.5    | 0.9 | 0.87             | 0.7    | 1.1 |  |
| Woodworking Machine Tool Setters and Operators                                                    | 7523 | 1588   | 12.3    | 6.8                | 0.45             | 0.60             | 0.4    | 0.8 | 0.76             | 0.6    | 1.0 |  |
| Mixed Crop and Animal Producers                                                                   | 6130 | 1078   | 27.9    | 5.7                | 0.61             | 0.73             | 0.5    | 1.0 | 0.94             | 0.7    | 1.3 |  |
| Printers                                                                                          | 7322 | 936    | 16.2    | 8.4                | 0.55             | 0.63             | 0.4    | 0.9 | 0.80             | 0.6    | 1.2 |  |
| Garden and Horticultural Labourers                                                                | 9214 | 934    | 32.1    | 8.1                | 0.61             | 0.66             | 0.5    | 0.9 | 0.86             | 0.6    | 1.2 |  |

<sup>0</sup> Average number of PCR tests per employees and occupation from start of follow-up.

<sup>1</sup> Adjusted for sex and age (10 year groups).

<sup>2</sup> In addition to sex and age, adjusted for duration of education at baseline (5 groups), number of hospital admissions for one or more of 11 chronic diseases in the 10 years preceding start of the pandemic (3 groups), country of birth (4 groups), geographical region (5 groups), number of household members (4 groups), probability of tobacco smoking (3 groups), bodymass index (2 groups), completed Covid-19 vaccination (time varying variable, yes/no) and pandemic wave (4 groups).

<sup>3</sup> In addition to above fully adjusted risk estimates adjusted for the occupation-specific average number of PCR-tests during follow-up (up to and including last week before censoring) per employee (quintiles).



**Supplemental table S4.** Adjusted incidence rate ratio (IRR with 99% CI) of SARS-CoV-2 infection across pandemic waves for at-risk occupations grouped by economic sector compared with a job-exposure matrix derived reference group<sup>1</sup>.

| Economic sector (2-digit DB07 codes) | Pandemic wave | N       | Tests <sup>0</sup> | IRR <sup>1</sup> | IRR <sup>2</sup> | 99% CI |      | IRR <sup>3</sup> | 99% CI |      |
|--------------------------------------|---------------|---------|--------------------|------------------|------------------|--------|------|------------------|--------|------|
| <b>SOCIAL WORK</b>                   |               |         |                    |                  |                  |        |      |                  |        |      |
|                                      | 1             | 138 877 | 0.42               | 1.09             | 1.12             | 0.9    | 1.3  | 0.98             | 0.8    | 1.2  |
|                                      | 2             | 137 390 | 2.87               | 1.41             | 1.45             | 1.4    | 1.5  | 1.26             | 1.2    | 1.3  |
|                                      | 3             | 130 847 | 5.74               | 1.34             | 1.37             | 1.3    | 1.5  | 1.24             | 1.2    | 1.3  |
|                                      | 4             | 127 775 | 4.37               | 1.39             | 1.45             | 1.4    | 1.5  | 1.36             | 1.3    | 1.4  |
| <b>RESIDENTIAL CARE</b>              |               |         |                    |                  |                  |        |      |                  |        |      |
|                                      | 1             | 138 101 | 0.62               | 4.82             | 3.37             | 2.9    | 4.0  | 3.05             | 2.3    | 4.0  |
|                                      | 2             | 134 501 | 4.52               | 1.92             | 1.67             | 1.6    | 1.8  | 1.32             | 1.2    | 1.4  |
|                                      | 3             | 125 933 | 6.84               | 0.97             | 0.83             | 0.8    | 0.9  | 0.71             | 0.6    | 0.8  |
|                                      | 4             | 123 907 | 4.79               | 1.07             | 1.08             | 1.0    | 1.1  | 0.97             | 0.9    | 1.0  |
| <b>EDUCATION</b>                     |               |         |                    |                  |                  |        |      |                  |        |      |
|                                      | 1             | 112 551 | 0.36               | 0.98             | 1.13             | 0.9    | 1.4  | 1.07             | 0.9    | 1.3  |
|                                      | 2             | 110 626 | 2.77               | 1.30             | 1.46             | 1.4    | 1.5  | 1.41             | 1.3    | 1.5  |
|                                      | 3             | 105 623 | 4.98               | 1.20             | 1.39             | 1.3    | 1.5  | 1.33             | 1.2    | 1.4  |
|                                      | 4             | 103 481 | 4.02               | 1.42             | 1.57             | 1.5    | 1.6  | 1.52             | 1.5    | 1.6  |
| <b>HEALTHCARE</b>                    |               |         |                    |                  |                  |        |      |                  |        |      |
|                                      | 1             | 109 890 | 0.68               | 7.67             | 10.78            | 9.5    | 12.3 | 8.24             | 6.7    | 10.1 |
|                                      | 2             | 106 577 | 4.92               | 1.82             | 2.16             | 2.1    | 2.3  | 1.72             | 1.6    | 1.8  |
|                                      | 3             | 100 188 | 8.16               | 0.62             | 0.76             | 0.7    | 0.8  | 0.65             | 0.6    | 0.7  |
|                                      | 4             | 99 151  | 5.79               | 0.93             | 1.04             | 1.0    | 1.1  | 0.96             | 0.9    | 1.0  |
| <b>DEFENSE AND SECURITY</b>          |               |         |                    |                  |                  |        |      |                  |        |      |
|                                      | 1             | 34 399  | 0.44               | 1.74             | 2.59             | 2.0    | 3.3  | 2.41             | 1.9    | 3.1  |
|                                      | 2             | 33 831  | 2.86               | 1.32             | 1.62             | 1.5    | 1.8  | 1.48             | 1.4    | 1.6  |
|                                      | 3             | 32 148  | 5.10               | 1.03             | 1.13             | 1.0    | 1.3  | 1.07             | 0.9    | 1.2  |
|                                      | 4             | 31 474  | 3.88               | 1.05             | 1.20             | 1.1    | 1.3  | 1.15             | 1.1    | 1.2  |
| <b>OTHER ACTIVITIES</b>              |               |         |                    |                  |                  |        |      |                  |        |      |
|                                      | 1             | 116 046 | 0.35               | 1.84             | 1.64             | 1.4    | 1.9  | 1.33             | 1.1    | 1.6  |
|                                      | 2             | 112 911 | 2.52               | 1.41             | 1.34             | 1.3    | 1.4  | 1.32             | 1.3    | 1.4  |
|                                      | 3             | 106 990 | 4.91               | 1.44             | 1.35             | 1.3    | 1.4  | 1.36             | 1.3    | 1.5  |
|                                      | 4             | 104 170 | 3.86               | 1.19             | 1.18             | 1.1    | 1.2  | 1.27             | 1.2    | 1.3  |
| <b>MISSING DISCO-08 CODE</b>         |               |         |                    |                  |                  |        |      |                  |        |      |
|                                      | 1             | 337 306 | 0.30               | 1.11             | 1.91             | 1.5    | 2.5  | 2.40             | 1.7    | 3.3  |
|                                      | 2             | 327 234 | 2.03               | 1.06             | 1.26             | 1.2    | 1.4  | 1.51             | 1.4    | 1.7  |
|                                      | 3             | 313 270 | 3.72               | 1.08             | 1.04             | 0.9    | 1.2  | 1.22             | 1.1    | 1.4  |
|                                      | 4             | 306 842 | 3.12               | 1.07             | 1.15             | 1.1    | 1.2  | 1.26             | 1.2    | 1.4  |

<sup>0</sup> Average number of PCR tests per employees and occupation from start of follow-up.

<sup>1</sup> Adjusted for sex and age (10 year groups)

<sup>2</sup> In addition to sex and age, adjusted for duration of education at baseline (5 groups), number of hospital admissions for one or more of 11 chronic diseases in the 10 years preceding start of the pandemic (3 groups), country of birth (4 groups), geographical region (5 groups), number of household members (4 groups), probability of tobacco smoking (3 groups), bodymass index (2 groups), completed Covid-19 vaccination (time varying variable, yes/no) and pandemic wave (4 groups).

<sup>3</sup> In addition to above fully adjusted risk estimates adjusted for the occupation-specific average number of PCR-tests during follow-up (up to and including last week before censoring) per employee (quintiles).

## Reference

1. Oude Hengel KM, Burdorf A, Pronk A, et al. Exposure to a SARS-CoV-2 infection at work: development of an international job exposure matrix (COVID-19-JEM). *Scand J Work Environ Health* 2022;48(1):61-70. doi: 10.5271/sjweh.3998 [published Online First: 2021/11/18]
